# Supplementary material for: Micro-Volume Blood Separation Membrane for In-Situ Biosensing
Source: MDPI journal article supplement (doi:10.3390/bios12090712), 2022-09-02
Supplement: s1 [file s1]

# Micro–Volume Blood Separation Membrane for In–Situ Biosensing

Qin Zhu <sup>1,2</sup>, Huimin Wu <sup>3</sup>, Zhen Ma <sup>2</sup>, Yuqiao Liu <sup>2</sup>, Junmin Li <sup>2</sup>, Ling Zhu <sup>2</sup>, Xinran Zhang <sup>2</sup>, Chengcheng Wang <sup>2</sup>, Dajing Chen <sup>2\*</sup> and Danhua Zhu <sup>1\*</sup>

<sup>1</sup> State Key Laboratory for Diagnosis and Treatment of Infectious Diseases, The First Affiliated Hospital, Zhejiang University School of Medicine, Hangzhou 311100, China

<sup>2</sup> School of Pharmacy, Hangzhou Normal University, Hangzhou 311121, China

<sup>3</sup> MOE Key Laboratory of Macromolecular Synthesis and Functionalization, Department of Polymer Science and Engineering, Zhejiang University, Hangzhou 310027, China

\* Correspondence: djchen@hznu.edu.cn (D.C.); zhudanhua@zju.edu.cn (D.Z.)

**Table S1** The influences of different temperatures, the concentrations of CA, and types of solvent to diffusion distances.

| Samples           | Temperature (°C) | Solvent             | Diffusion Distances (mm) |
|-------------------|------------------|---------------------|--------------------------|
| 6% CA+6% PEG–2000 | 25               | water               | 0                        |
| 7% CA             | 25               | water               | 1.5                      |
| 7%CA+6%PEG–2000   | 15               | water               | 2                        |
| 7%CA+6%PEG–2000   | 20               | water               | 3.1                      |
| 7%CA+6%PEG–2000   | 25               | water               | 4.5                      |
| 7%CA+6%PEG–2000   | 35               | water               | 4                        |
| 7%CA+6%PEG–2000   | 45               | water               | 2.3                      |
| 7%CA+6%PEG–2000   | 25               | Methanol :water 2:8 | 2                        |
| 7%CA+6%PEG–2000   | 25               | Methanol :water 3:7 | 0                        |
| 7%CA+6%PEG–2000   | 25               | Methanol :water 4:6 | 0                        |

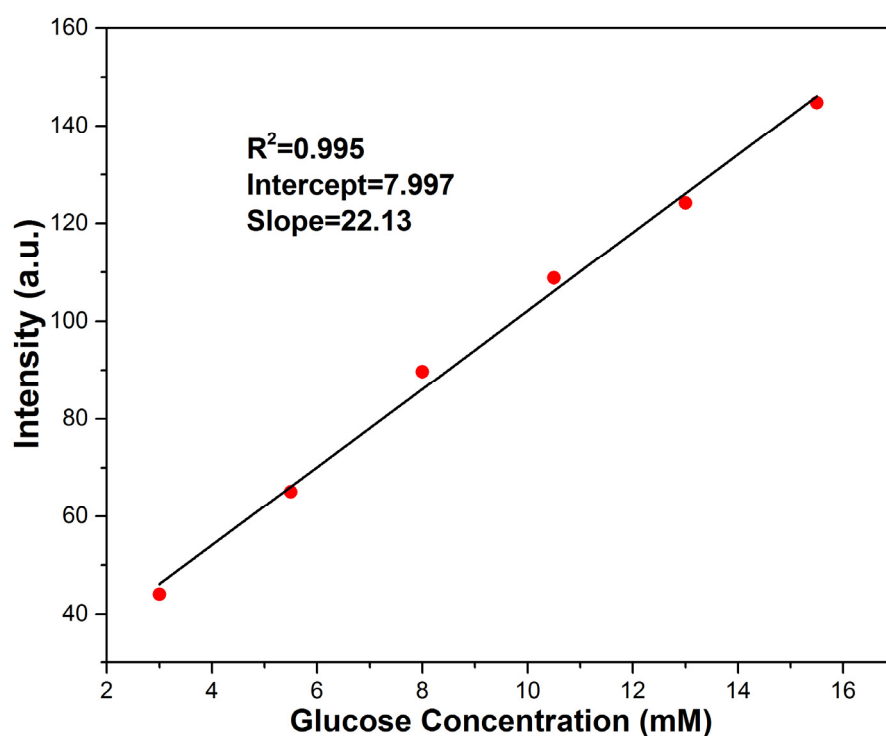

**Figure S1.** Linear calibration plot of the chromogenic intensity vs. glucose concentration using Image J software.

**Table S2.** Performance comparison between our testing strip and other passive devices for plasma separation.

| References | Methods             | Whole blood Volume | Separation Rate | Time(Process Rate) |
|------------|---------------------|--------------------|-----------------|--------------------|
| [1]        | Membrane filter     | 45 $\mu$ l         | 60%             | 72 sec             |
| [2]        | Membrane filter     | 1.8 ml             | 28.6%–31%       |                    |
| [3]        | Membrane filter     | 250 $\mu$ l        | 53.8%           | 10 min             |
| [4]        | Membrane filter     | 60 ml              | 71.7            | 6 min              |
| [5]        | microfluidic device | 100 $\mu$ l        | 20%–22%         | 10 min             |
| [6]        | microchip           | 200 $\mu$ l        | 65%             | 25 min             |
| This work  | Membrane filter     | 5 $\mu$ l          | 68.7%–75%       | 2 min              |

## References

1. Xiao, Z.; Sun, L.; Yang, Y.; Feng, Z.; Dai, S.; Yang, H.; Zhang, X.; Sheu, C.; Guo, W. High-Performance Passive Plasma Separation on OSTE Pillar Forest. *Biosensors*. **2021**, *11*, 355
2. Liu, C.; Mauk, M.; Gross, R.; Bushman, F. D.; Edelstein, P. H.; Collman, R. G.; Bau, H. H. Membrane-based, sedimentation-assisted plasma separator for point-of-care applications. *Anal*

*Chem.* **2013**, *85*, 10463-10470.

3. Baillargeon, K. R.; Murray, L. P.; Deraney, R. N.; Mace, C. R. High-Yielding Separation and Collection of Plasma from Whole Blood Using Passive Filtration. *Anal Chem.* **2020**, *92*, 16245-16252.
4. Gao, Q.; Chang, Y.; Deng, Q.; You, H. A simple and rapid method for blood plasma separation driven by capillary force with an application in protein detection. *Anal Methods.* **2020**, *12*, 2560-2570.
5. Homsy, A.; van der Wal, P. D.; Doll, W.; Schaller, R.; Korsatko, S.; Ratzer, M.; Ellmerer, M.; Pieber, T. R.; Nicol, A.; de Rooij, N. F. Development and validation of a low cost blood filtration element separating plasma from undiluted whole blood. *Biomicrofluidics.* **2012**, *6*, 12804-128049.
6. Aota, A.; Takahashi, S.; Mawatari, K.; Tanaka, Y.; Sugii, Y.; Kitamori, T. Microchip-based Plasma Separation from Whole Blood via Axial Migration of Blood Cells. *Analytical Sciences.* **2011**, *27* (12), 1173-1178.
